# Supplementary material for: Characterization of Extended-Spectrum Beta-Lactamase-Producing Escherichia coli Isolates from Jurong Lake, Singapore with Whole-Genome-Sequencing
Source: PubMed Central journal article supplement (PMC7908357; doi:10.3390/ijerph18030937), 2021-01-22
Supplement: ijerph-18-00937-s001.pdf [file ijerph-18-00937-s001.pdf]

# Characterization of Extended-Spectrum Beta-Lactamase-Producing *Escherichia coli* isolates from Jurong Lake, Singapore with Whole-Genome-Sequencing

Yang Zhong<sup>1,2</sup>, Siyao Guo<sup>1,2</sup>, Kelyn Lee Ghee Seow<sup>1,2</sup>, Glendon Ong Hong

Ming<sup>1,2</sup>, Joergen Schlundt<sup>1,2\*</sup>

<sup>1</sup> Nanyang Technological University Food Technology Centre (NAFTEC), 62 Nanyang Drive Singapore 637459

<sup>2</sup> School of Chemical and Biomedical Engineering, Nanyang Technological University, 62 Nanyang Drive Singapore 637459

\*Corresponding author

| Strain ID   | GC content /% | Genome size /bp | Kmer result    | MLST | Plasmid Ori detected                                 |
|-------------|---------------|-----------------|----------------|------|------------------------------------------------------|
| <b>J1E1</b> | 50.6          | 5,111,241       | <i>E. coli</i> | 68   | IncFII(pCoo)*, Col156*                               |
| <b>J1E2</b> | 50.5          | 4,953,866       | <i>E. coli</i> | 457  | Inc11*,ColpVC*                                       |
| <b>J1E3</b> | 50.3          | 5,176,493       | <i>E. coli</i> | 127  | IncFII(pRSB107), IncFIB*,IncFIA,Col156*              |
| <b>J1E4</b> | 50.5          | 4,866,444       | <i>E. coli</i> | 10   | IncFIA(HI1),IncHI1A,IncHI1B(R27)                     |
| <b>J1G1</b> | 50.3          | 5,408,697       | <i>E. coli</i> | 648  | IncFII(pRSB107), IncFIB*,IncFIA*,Col156*,Col(MG828)* |
| <b>J2E1</b> | 50.7          | 5,006,788       | <i>E. coli</i> | 131  | IncFII(pRSB107), IncFIB*,IncFIA,Col156*              |
| <b>J2E2</b> | 50.6          | 5,088,348       | <i>E. coli</i> | 38   | IncFII(pHN7A8)*,ColpVC*                              |
| <b>J2E3</b> | 50.5          | 5,248,876       | <i>E. coli</i> | 1730 | IncFIB*,IncFII,IncHI2,IncHI2A*                       |
| <b>J2E4</b> | 50.6          | 4,886,227       | <i>E. coli</i> | 215  | IncFIA(HI1)*,IncHI1*,IncR*, IncX4, IncFIA*           |

**Table 1: Basic Information of the isolates. \*: without 100% identify.**

| Isolates ID | Aminoglycoside                                                       | Beta-lactam                                                   | Colistin       | Fluoroquinolone                                                                 | Fosfomycin                   | MLS                   |
|-------------|----------------------------------------------------------------------|---------------------------------------------------------------|----------------|---------------------------------------------------------------------------------|------------------------------|-----------------------|
| J1E1        |                                                                      | <i>bla</i> <sub>CTX-M-15</sub>                                |                |                                                                                 | <i>fosA4</i>                 | <i>mdf(A)*,mph(A)</i> |
| J1E2        |                                                                      | <i>bla</i> <sub>CTX-M-8</sub>                                 |                |                                                                                 |                              | <i>mdf(A)*</i>        |
| J1E3        | <i>aph(3'')-lb, aadA5, aac(3)-lld*, aph(6)-ld</i>                    | <i>bla</i> <sub>TEM-1B</sub> , <i>bla</i> <sub>CTX-M-15</sub> |                | <i>gyrA</i> p.S83L                                                              |                              | <i>mdf(A)*,mph(A)</i> |
| J1E4        | <i>aadA1*</i>                                                        | <i>bla</i> <sub>TEM-1B</sub> , <i>bla</i> <sub>CTX-M-15</sub> | <i>mcr-1.1</i> | <i>qnrS1, gyrA</i> p.S83L                                                       |                              | <i>mdf(A)*</i>        |
| J1G1        |                                                                      | <i>bla</i> <sub>CTX-M-14</sub>                                |                | <i>gyrA</i> p.S83L, p.D87N, <i>parE</i> p.S458A, <i>parC</i> p.S80I             |                              | <i>mdf(A)*</i>        |
| J2E1        | <i>aph(3'')-lb, aadA5, aph(6)-ld</i>                                 | <i>bla</i> <sub>CTX-M-27</sub>                                |                | <i>parC</i> p.S80I, <i>parE</i> p.E460D, <i>gyrA</i> p.D87N, <i>gyrA</i> p.S83L |                              | <i>mdf(A)*,mph(A)</i> |
| J2E2        |                                                                      | <i>bla</i> <sub>CTX-M-15</sub>                                |                | <i>qnrS1</i>                                                                    |                              | <i>mdf(A)*</i>        |
| J2E3        | <i>aph(3')-la*, aadA2, aac(3)-lld*, aph(6)-ld,aph(3'')-lb,aadA1*</i> | <i>bla</i> <sub>CTX-M-55</sub>                                | <i>mcr-3.1</i> | <i>qnrS1*</i>                                                                   |                              | <i>mdf(A)*,mph(A)</i> |
| J2E4        |                                                                      | <i>bla</i> <sub>CTX-M-15</sub>                                |                | <i>qnrS1</i>                                                                    |                              | <i>mdf(A)*</i>        |
| Isolates ID | Phenicol                                                             | Sulphonamide                                                  | Tetracycline   | Trimethoprim                                                                    | Total resistant genes number |                       |
| J1E1        |                                                                      |                                                               |                |                                                                                 | 4                            |                       |
| J1E2        |                                                                      |                                                               |                |                                                                                 | 2                            |                       |
| J1E3        |                                                                      | <i>sul1,sul2</i>                                              | <i>tet(A)</i>  | <i>dfrA17</i>                                                                   | 12                           |                       |
| J1E4        | <i>floR*</i>                                                         | <i>sul3</i>                                                   | <i>tet(A)</i>  |                                                                                 | 9                            |                       |
| J1G1        |                                                                      |                                                               |                | <i>dfrA17</i>                                                                   | 3                            |                       |
| J2E1        |                                                                      | <i>sul1,sul2</i>                                              | <i>tet(A)</i>  | <i>dfrA17</i>                                                                   | 10                           |                       |
| J2E2        |                                                                      |                                                               |                |                                                                                 | 3                            |                       |
| J2E3        | <i>floR*,catA2*</i>                                                  | <i>sul1,sul3</i>                                              | <i>tet(A)*</i> | <i>dfrA12</i>                                                                   | 17                           |                       |
| J2E4        |                                                                      |                                                               |                |                                                                                 | 3                            |                       |

**Table 2: Acquired resistance genes and resistance-related mutations detected in isolates by ResFinder. MLS: macrolide, lincosamide, and streptogramin B,\*:**

identification below 100%.

| Isolates ID | Aminoglycoside |                           | Beta-lactam |                 | Colistin |                 | Fluoroquinolone |                                |
|-------------|----------------|---------------------------|-------------|-----------------|----------|-----------------|-----------------|--------------------------------|
|             | Genotype       | Phenotype (Gentamic, MIC) | Genotype    | Phenotype (MIC) | Genotype | Phenotype (MIC) | Genotype        | Phenotype (Ciprofloxacin, MIC) |
| J1E1        | -              | S                         | +           | R               | -        | S               | -               | S                              |
| J1E2        | -              | S                         | +           | R               | -        | S               | -               | S                              |
| J1E3        | +              | R                         | +           | R               | -        | S               | +               | S                              |
| J1E4        | +              | S                         | +           | R               | +        | R               | +               | R                              |
| J1G1        | -              | S                         | +           | R               | -        | S               | +               | R                              |
| J2E1        | +              | S                         | +           | R               | -        | S               | +               | R                              |
| J2E2        | -              | S                         | +           | R               | -        | S               | +               | S                              |
| J2E3        | +              | S                         | +           | R               | +        | S               | +               | S                              |
| J2E4        | -              | S                         | +           | R               | -        | S               | +               | R                              |

  

| Isolates ID | Phenicol |                                             | Sulphonamide |                                                           | Tetracycline |                            |
|-------------|----------|---------------------------------------------|--------------|-----------------------------------------------------------|--------------|----------------------------|
|             | Genotype | Phenotype (Chloramphenicol, Disc diffusion) | Genotype     | Phenotype (Trimethoprim-sulfamethoxazole, Disc Diffusion) | Genotype     | Phenotype (Disc Diffusion) |
| J1E1        | -        | S                                           | -            | R                                                         | -            | S                          |
| J1E2        | -        | S                                           | -            | S                                                         | -            | S                          |
| J1E3        | -        | S                                           | +            | R                                                         | +            | R                          |
| J1E4        | +        | R                                           | +            | S                                                         | +            | R                          |
| J1G1        | -        | S                                           | -            | S                                                         | -            | S                          |
| J2E1        | -        | S                                           | +            | R                                                         | +            | R                          |
| J2E2        | -        | S                                           | -            | S                                                         | -            | S                          |
| J2E3        | +        | R                                           | +            | R                                                         | +            | R                          |
| J2E4        | -        | S                                           | -            | S                                                         | -            | S                          |

**Table 3. the comparison of phenotypic and genotypic resistance.** +/-: with/without resistance genes or related mutations, S: sensitive, R: resistance, Grey highlight: disagreement between genotype and phenotype.

Tree scale: 0.1

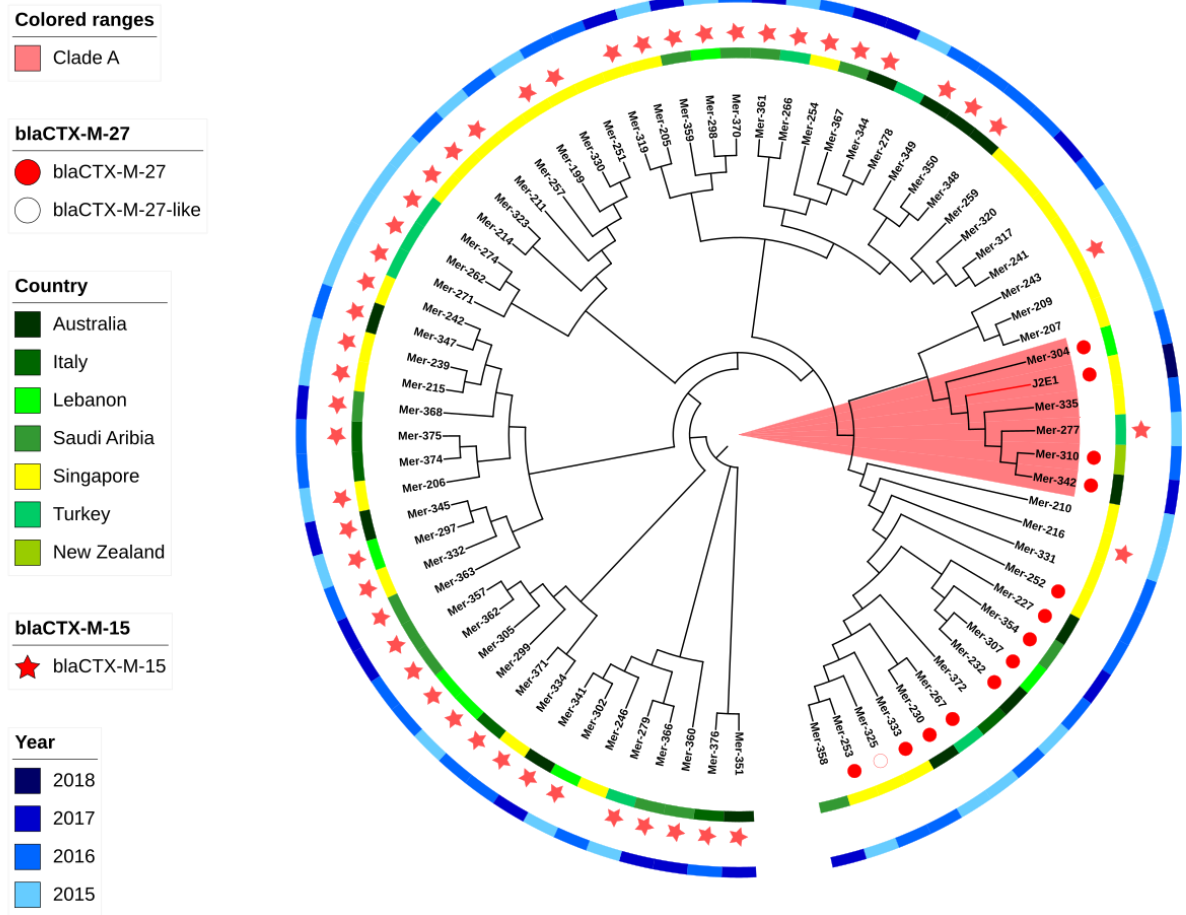

**Fig 1. the phylogenetic tree of ST131 isolates from both the clinic and reservoir based on core genome SNPs. The tree was built with *E. coli* MG1655 as the reference genome and branch length was ignored. J2E1 was isolated in this research and or the other isolates were from NCBI. The metadata was shown in supplementary**

| Isolate ID | Contigs information |                   | Resistance information        |                         | Insert sequence Information |                  |                 |           |           |
|------------|---------------------|-------------------|-------------------------------|-------------------------|-----------------------------|------------------|-----------------|-----------|-----------|
|            | Contigs ID          | contigs length/bp | AMR genes                     | Position on the contigs | Insert sequence ID          | Insert length/bp | Insert position | IS family | Acession  |
| J1E1       | 27                  | 269951            | <i>bla<sub>CTX-M-15</sub></i> | 197172..198047          | ISEcp1                      | 1656             | 195468..197123  | IS1380    | AJ242809  |
| J1E3       | 151                 | 128211            | <i>bla<sub>CTX-M-15</sub></i> | 86273..87148            | ISEcp1                      | 1656             | 84569..86224    | IS1380    | AJ242809  |
| J1E4       | 28                  | 128728            | <i>bla<sub>CTX-M-15</sub></i> | 43925..44800            | ISEcp1                      | 1656             | 42221..43876    | IS1380    | AJ242809  |
| J1G1       | 80                  | 110660            | <i>bla<sub>CTX-M-14</sub></i> | 83884..84759            | ISEcp1                      | 1656             | 82186..83841    | IS1380    | AJ242809  |
| J2E2       | 31                  | 289403            | qnrS1                         | 242382..243038          | ISKpn19*                    | 2851             | 238783..241633  | ISKra4    | NC_010886 |
|            |                     |                   | <i>bla<sub>CTX-M-15</sub></i> | 247679..248554          | ISEcp1*                     | 1656             | 248603..250258  | IS1380    | AJ242809  |
| J2E4       | 220                 | 716717            | qnrS1                         | 555846..556502          | ISEcp1                      | 1656             | 562067..563722  | IS1380    | AJ242809  |
|            |                     |                   | <i>bla<sub>CTX-M-15</sub></i> | 561143..562018          |                             |                  |                 |           |           |

**Table 4. Insert sequence and their location detected by ISFinder.** \*: identification below 100%.

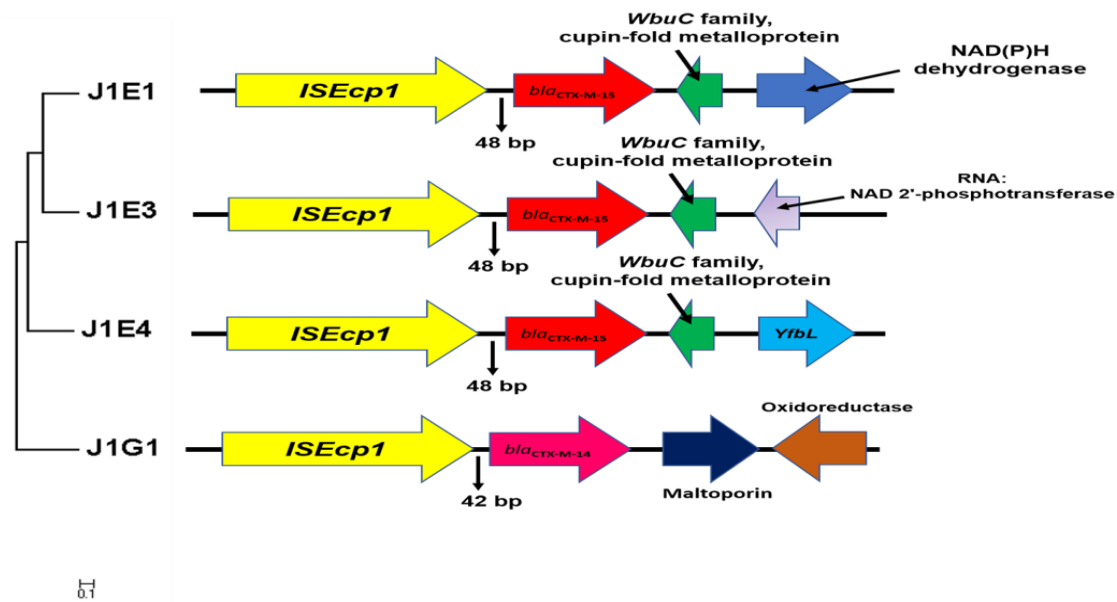

**Fig 2. The genetic environment surrounding *bla*<sub>CTX-M</sub> genes located on the chromosome.** The maximum likelihood tree was built based on the alignment of 5000 bp fragments contain insert sequence and *bla*<sub>CTX-M</sub> gene extract from the chromosome. The gene annotation and direction were generated by the RAST server and further corrected with NCBI blast. The conversed gene cluster contains *ISEcp1*, *bla*<sub>CTX-M-15</sub>, and *WubC* family metalloprotein.

| Antimicrobials                          | J1E4<br>(Donor) | J53Coli<br>(Transconjugates) | J53<br>(Recept) |
|-----------------------------------------|-----------------|------------------------------|-----------------|
| Ceftriaxone                             | >128            | >128                         | <1              |
| Meropenem                               | <1              | <1                           | <1              |
| Cephalothin                             | >16             | >16                          | >16             |
| Cefpodoxime                             | >32             | >32                          | 2               |
| Ciprofloxacin                           | 2               | >2                           | <1              |
| Cefotaxime                              | >64             | >64                          | <0.25           |
| Gentamicin                              | <4              | <4                           | <4              |
| Cefotaxime / clavulanic acid            | <0.12\4         | <0.12\4                      | <0.12\4         |
| Ampicillin                              | >16             | >16                          | <8              |
| Ceftazidime                             | >128            | 32                           | 1               |
| Cefazolin                               | >16             | >16                          | <8              |
| Ceftazidime / clavulanic acid           | 0.25\4          | 0.5\4                        | 0.5\4           |
| Imipenem                                | <0.5            | 1                            | 1               |
| Piperacillin / tazobactam<br>constant 4 | >64\4           | <4\4                         | <4\4            |
| Cefepime                                | >16             | >16                          | <1              |
| Colistin                                | 4               | 8                            | <0.25           |
| Cefoxitin                               | <4              | 8                            | <4              |

**Table 5. The MIC comparison among J1E4, J53, and the transconjugants.** The

MIC was determined with the microdilution methods. The successful transconjugants gain multi-drug resistance from the donor strain J1E4 including the resistance of

colistin, 3<sup>rd</sup> generation cephalosporins, and ciprofloxacin.



**Supplementary Data:**

| Antimicrobials                       | J1E1  | J1E2    | J1E3    | J1E4    | J1G1    | J2E1    | J2E2    | J2E3    | J2E4    | Breakpoint<br>(CLSI-M100-<br>ED30, Table<br>2A) |
|--------------------------------------|-------|---------|---------|---------|---------|---------|---------|---------|---------|-------------------------------------------------|
| Ceftriaxone                          | >128  | >128    | >128    | >128    | >128    | >128    | >128    | >128    | >128    | 4                                               |
| Meropenem                            | <1    | <1      | <1      | <1      | <1      | <1      | <1      | <1      | <1      | 4                                               |
| Cephalothin                          | >16   | >16     | >16     | >16     | >16     | >16     | >16     | >16     | >16     | N.A.                                            |
| Cefpodoxime                          | >32   | >32     | >32     | >32     | >32     | >32     | >32     | >32     | >32     | 8                                               |
| Ciprofloxacin                        | <1    | <1      | <1      | 2       | >2      | >2      | <1      | <1      | >2      | 1                                               |
| Cefotaxime                           | >64   | >64     | >64     | >64     | >64     | >64     | >64     | >64     | >64     | 4                                               |
| Gentamicin                           | <4    | <4      | >16     | <4      | <4      | <4      | <4      | <4      | <4      | 16                                              |
| Cefotaxime / clavulanic acid         | 32\4  | <0.12\4 | <0.12\4 | <0.12\4 | <0.12\4 | <0.12\4 | <0.12\4 | <0.12\4 | <0.12\4 | N.A.                                            |
| Ampicillin                           | >16   | >16     | >16     | >16     | >16     | >16     | >16     | >16     | >16     | 32                                              |
| Ceftazidime                          | >128  | 1       | 32      | >128    | 1       | 4       | 8       | 64      | >128    | 16                                              |
| Cefazolin                            | >16   | >16     | >16     | >16     | >16     | >16     | >16     | >16     | >16     | 32                                              |
| Ceftazidime / clavulanic acid        | 4\4   | <0.12\4 | <0.12\4 | 0.25\4  | 0.25\4  | <0.12\4 | <0.12\4 | 0.25\4  | 8\4     | N.A.                                            |
| Imipenem                             | <0.5  | <0.5    | <0.5    | <0.5    | <0.5    | <0.5    | <0.5    | <0.5    | <0.5    | 4                                               |
| Piperacillin / tazobactam constant 4 | >64\4 | <4\4    | <4\4    | >64\4   | <4\4    | <4\4    | 4\4     | <4\4    | >64\4   | 128\4                                           |
| Cefepime                             | >16   | >16     | >16     | >16     | >16     | >16     | >16     | >16     | >16     | 16                                              |
| Cefoxitin                            | 16    | 8       | <4      | <4      | 16      | 8       | 8       | 16      | <4      | 32                                              |

**Table S1: MIC of selected antimicrobials.** Based on the breakpoint of CLSI-M100, Red: resistant, yellow: intermedium, green: sensitive.

|         | Time | Country      | Patient sex | Age | Diseases            | Source | SRA number |
|---------|------|--------------|-------------|-----|---------------------|--------|------------|
| Mer-376 | 2016 | Italy        | female      | 89  | bacterial infection | blood  | 7828786    |
| Mer-375 | 2016 | Italy        | female      | 84  | bacterial infection | blood  | 7828661    |
| Mer-374 | 2016 | Italy        | female      | 81  | bacterial infection | blood  | 7828658    |
| Mer-372 | 2016 | Italy        | male        | 62  | bacterial infection | blood  | 7828660    |
| Mer-371 | 2016 | Italy        | male        | 66  | bacterial infection | blood  | 7828655    |
| Mer-370 | 2016 | Saudi Aribia | female      | 61  | bacterial infection | blood  | 7828746    |
| Mer-368 | 2017 | Saudi Aribia | male        | 85  | bacterial infection | blood  | 7828744    |
| Mer-367 | 2017 | Saudi Aribia | female      | 52  | bacterial infection | blood  | 7828743    |
| Mer-366 | 2017 | Saudi Aribia | male        | 80  | bacterial infection | blood  | 7828638    |
| Mer-363 | 2017 | Saudi Aribia | male        | 94  | bacterial infection | blood  | 7828739    |
| Mer-362 | 2016 | Saudi Aribia | male        | 83  | bacterial infection | blood  | 7828820    |
| Mer-361 | 2017 | Saudi Aribia | female      | 25  | bacterial infection | blood  | 7828821    |
| Mer-360 | 2017 | Saudi Aribia | male        | 50  | bacterial infection | blood  | 7828822    |
| Mer-359 | 2017 | Saudi Aribia | male        | 55  | bacterial infection | blood  | 7828823    |
| Mer-358 | 2017 | Saudi Aribia | male        | 80  | bacterial infection | blood  | 7828824    |
| Mer-357 | 2017 | Saudi Aribia | female      | 76  | bacterial infection | blood  | 7828825    |
| Mer-354 | 2017 | Saudi Aribia | male        | 89  | bacterial infection | blood  | 7828828    |
| Mer-351 | 2017 | Australia    | female      | 77  | bacterial infection | blood  | 7828742    |
| Mer-350 | 2016 | Australia    | female      | 80  | bacterial infection | blood  | 7828751    |
| Mer-349 | 2016 | Australia    | female      | 72  | bacterial infection | blood  | 7828752    |
| Mer-348 | 2016 | Australia    | male        | 82  | bacterial infection | blood  | 7828753    |
| Mer-347 | 2016 | Australia    | female      | 63  | bacterial infection | blood  | 7828754    |
| Mer-345 | 2017 | Australia    | male        | 73  | bacterial infection | blood  | 7828748    |
| Mer-344 | 2017 | Australia    | female      | 78  | bacterial infection | blood  | 7828749    |

|         |      |             |        |    |                     |       |         |
|---------|------|-------------|--------|----|---------------------|-------|---------|
| Mer-342 | 2017 | Australia   | male   | 84 | bacterial infection | blood | 7828715 |
| Mer-341 | 2017 | Australia   | female | 78 | bacterial infection | blood | 7828714 |
| Mer-335 | 2016 | Singapore   | male   | 78 | bacterial infection | blood | 7828724 |
| Mer-334 | 2016 | Singapore   | female | 38 | bacterial infection | blood | 7828723 |
| Mer-333 | 2016 | Singapore   | male   | 81 | bacterial infection | blood | 7828722 |
| Mer-332 | 2016 | Singapore   | male   | 76 | bacterial infection | blood | 7828721 |
| Mer-331 | 2016 | Singapore   | female | 59 | bacterial infection | blood | 7828736 |
| Mer-330 | 2016 | Singapore   | female | 39 | bacterial infection | blood | 7828737 |
| Mer-325 | 2016 | Singapore   | male   | 56 | bacterial infection | blood | 7828730 |
| Mer-323 | 2016 | Singapore   | female | 78 | bacterial infection | blood | 7828728 |
| Mer-320 | 2017 | Singapore   | male   | 85 | bacterial infection | blood | 7828708 |
| Mer-319 | 2017 | Singapore   | female | 90 | bacterial infection | blood | 7828707 |
| Mer-317 | 2016 | Singapore   | female | 40 | bacterial infection | blood | 7828703 |
| Mer-310 | 2016 | New Zealand | male   | 89 | bacterial infection | blood | 7828701 |
| Mer-307 | 2016 | Lebanon     | male   | 87 | bacterial infection | blood | 7828677 |
| Mer-305 | 2016 | Lebanon     | male   | 76 | bacterial infection | blood | 7828679 |
| Mer-304 | 2016 | Lebanon     | male   | 52 | bacterial infection | blood | 7828680 |
| Mer-302 | 2015 | Lebanon     | female | 76 | bacterial infection | blood | 7828682 |
| Mer-299 | 2015 | Lebanon     | male   | 75 | bacterial infection | blood | 7828645 |
| Mer-298 | 2015 | Lebanon     | female | 74 | bacterial infection | blood | 7828644 |
| Mer-297 | 2015 | Lebanon     | male   | 54 | bacterial infection | blood | 7828654 |
| Mer-279 | 2015 | Turkey      | male   | 30 | bacterial infection | blood | 7828838 |
| Mer-278 | 2015 | Turkey      | female | 59 | bacterial infection | blood | 7828835 |
| Mer-277 | 2015 | Turkey      | female | 69 | bacterial infection | blood | 7828836 |
| Mer-274 | 2015 | Turkey      | male   | 78 | bacterial infection | blood | 7828842 |

|         |      |             |        |    |                     |       |         |
|---------|------|-------------|--------|----|---------------------|-------|---------|
| Mer-271 | 2015 | Turkey      | female | 74 | bacterial infection | blood | 7828810 |
| Mer-267 | 2015 | Turkey      | female | 42 | bacterial infection | blood | 7828812 |
| Mer-266 | 2015 | Turkey      | male   | 72 | bacterial infection | blood | 7828811 |
| Mer-262 | 2015 | Turkey      | female | 85 | bacterial infection | blood | 7828813 |
| Mer-259 | 2016 | Singapore   | male   | 64 | bacterial infection | blood | 7828816 |
| Mer-257 | 2016 | Singapore   | female | 44 | bacterial infection | blood | 7828643 |
| Mer-254 | 2016 | Singapore   | male   | 72 | bacterial infection | blood | 7828798 |
| Mer-253 | 2015 | Singapore   | female | 67 | bacterial infection | blood | 7828793 |
| Mer-252 | 2016 | Singapore   | male   | 63 | bacterial infection | blood | 7828794 |
| Mer-251 | 2016 | Singapore   | male   | 82 | bacterial infection | blood | 7828795 |
| Mer-246 | 2016 | Singapore   | male   | 72 | bacterial infection | blood | 7828792 |
| Mer-243 | 2015 | Singapore   | female | 63 | bacterial infection | blood | 7828768 |
| Mer-242 | 2015 | Singapore   | female | 73 | bacterial infection | blood | 7828767 |
| Mer-241 | 2015 | Singapore   | male   | 55 | bacterial infection | blood | 7828766 |
| Mer-239 | 2015 | Singapore   | male   | 53 | bacterial infection | blood | 7828772 |
| Mer-237 | 2015 | New Zealand | male   | 60 | bacterial infection | blood | 7828770 |
| Mer-232 | 2015 | Australia   | male   | 78 | bacterial infection | blood | 7828844 |
| Mer-230 | 2015 | Australia   | male   | 66 | bacterial infection | blood | 7828848 |
| Mer-227 | 2016 | Australia   | female | 55 | bacterial infection | blood | 7828845 |
| Mer-216 | 2015 | Singapore   | female | 56 | bacterial infection | blood | 7828657 |
| Mer-215 | 2015 | Singapore   | male   | 76 | bacterial infection | blood | 7828656 |
| Mer-214 | 2015 | Singapore   | male   | 85 | bacterial infection | blood | 7828646 |
| Mer-211 | 2015 | Singapore   | female | 67 | bacterial infection | blood | 7828819 |
| Mer-210 | 2015 | Singapore   | female | 59 | bacterial infection | blood | 7828663 |
| Mer-209 | 2015 | Singapore   | female | 67 | bacterial infection | blood | 7828662 |

|         |      |           |        |    |                        |       |         |
|---------|------|-----------|--------|----|------------------------|-------|---------|
| Mer-207 | 2015 | Singapore | male   | 92 | bacterial<br>infection | blood | 7828664 |
| Mer-206 | 2015 | Singapore | male   | 61 | bacterial<br>infection | blood | 7828641 |
| Mer-205 | 2015 | Singapore | female | 78 | bacterial<br>infection | blood | 7828642 |
| Mer-202 | 2015 | Singapore | female | 61 | bacterial<br>infection | blood | 7828738 |
| Mer-199 | 2015 | Singapore | male   | 70 | bacterial<br>infection | blood | 7828633 |

Table S2: Metadata of isolates applied for phylogenetic analysis.

| Isolates ID | Aminoglycoside                                                               | Beta-lactam                           | Colistin | Fluoroquinolone                                                                                              | Fosfomycin | MLS                               | Phenicol | Sulphonamide              | Tetracycline  | Trimethoprim   |
|-------------|------------------------------------------------------------------------------|---------------------------------------|----------|--------------------------------------------------------------------------------------------------------------|------------|-----------------------------------|----------|---------------------------|---------------|----------------|
| Mer-304     | <i>aph(3'')-lb</i> ,<br><i>aadA5</i> , <i>aph(6)-ld</i>                      | <i>blaCTX-M-27</i>                    |          | <i>parC p.S80I</i> , <i>parE p.L445H</i> , <i>gyrA p. S83L</i> ,<br><i>gyrA p. D87N</i>                      |            | <i>mdf(A)*</i> ,<br><i>mph(A)</i> |          | <i>sul1</i> , <i>sul2</i> | <i>tet(A)</i> | <i>dfrA17*</i> |
| Mer-335     | <i>aadA5</i>                                                                 | <i>blaCTX-M-14</i>                    |          | <i>parC p.S80I</i> , <i>parC p.E84V</i> , <i>parE p.I529L</i> ,<br><i>gyrA p. S83L</i> , <i>gyrA p. D87N</i> |            | <i>mdf(A)*</i> ,<br><i>mph(A)</i> |          | <i>sul1</i>               | <i>tet(B)</i> | <i>dfrA17</i>  |
| Mer-277     | <i>aph(3'')-lb</i> ,<br><i>aph(6)-ld</i>                                     | <i>blaCTX-M-15</i> , <i>blaTEM-1B</i> |          | <i>parE p.I529L</i> , <i>gyrA p. S83L</i>                                                                    |            | <i>mdf(A)*</i>                    |          | <i>sul2</i>               | <i>tet(A)</i> |                |
| Mer-310     | <i>aph(3'')-lb</i> ,<br><i>aadA5</i> , <i>aac(3)-lld*</i> , <i>aph(6)-ld</i> | <i>blaCTX-M-27</i> , <i>blaTEM-1B</i> |          | <i>parE p.I529L</i> , <i>gyrA p. S83L</i>                                                                    |            | <i>mdf(A)*</i> ,<br><i>mph(A)</i> |          | <i>sul1</i> , <i>sul2</i> | <i>tet(A)</i> | <i>dfrA17</i>  |
| Mer-342     |                                                                              | <i>blaCTX-M-27</i> , <i>blaTEM-1B</i> |          | <i>parE p.I529L</i> , <i>gyrA p. S83L</i>                                                                    |            | <i>mdf(A)*</i>                    |          |                           |               |                |

**Table S3. Resistance gene list of ST131 clade A isolates.**

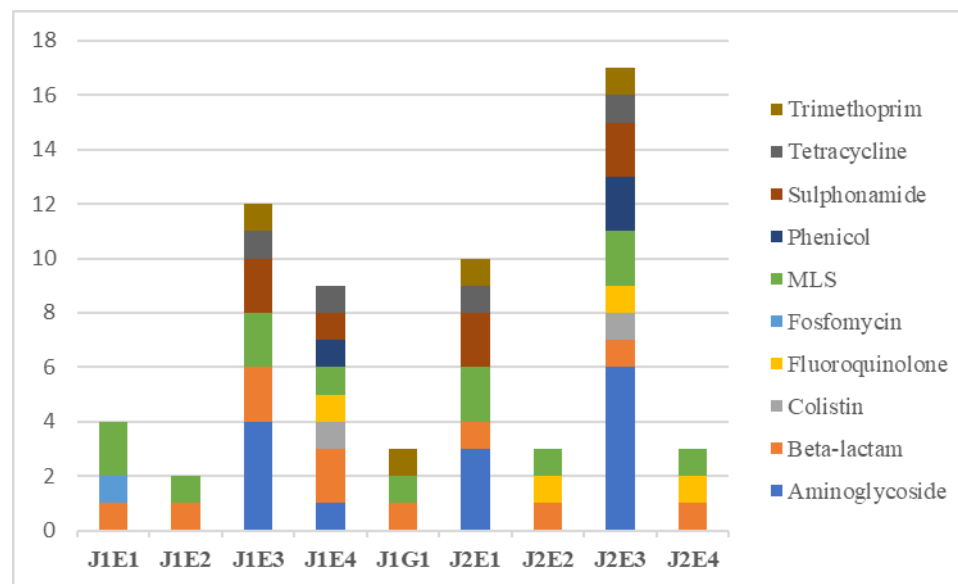

**Fig S1. The number of AMR genes subject to different classes detected by ResFinder.** The acquired AMR genes were detected with ResFinder as the default setting, only the acquired resistance genes were counted, the mutations are not shown here. The details of AMR profiling are shown in Table 2. MLS: macrolide, lincosamide, and streptogramin B.

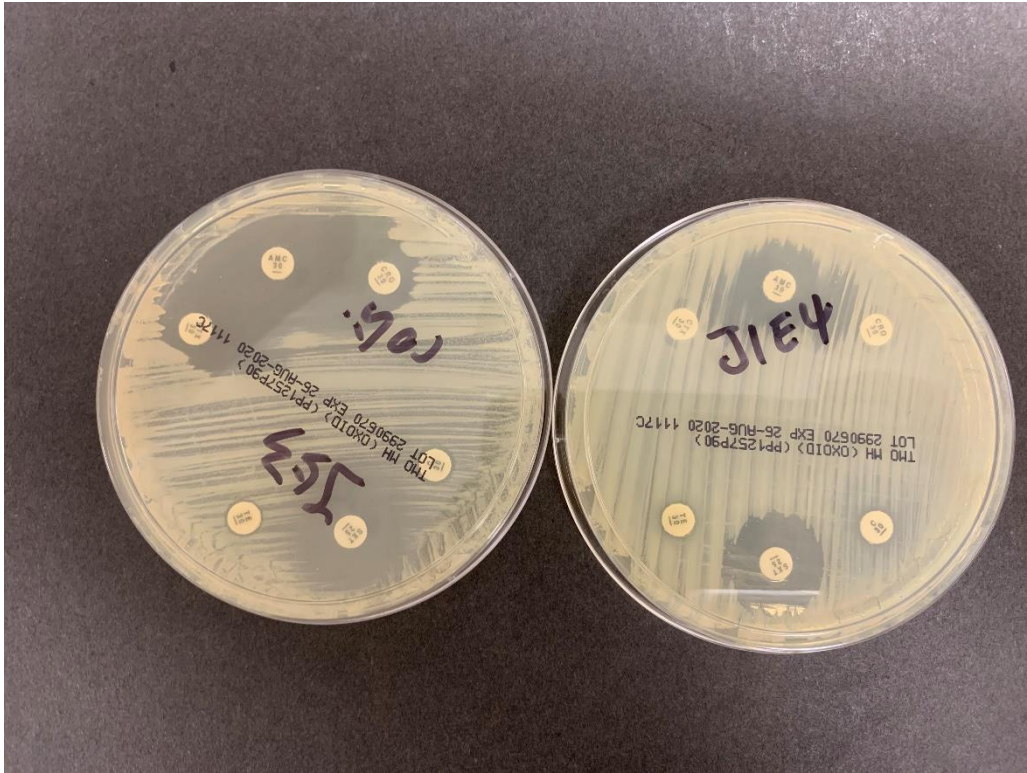

**Fig S2. The comparison of Disc diffusion result between the donor J1E4 and the transconjugant J53coli.**

Not like the donor, the transconjugant is less resistant to cefotaxime and ceftriaxone, without clear ESBL-producing phenotype. But the resistance to tetracycline and chloramphenicol was co-conjugated together with the colistin resistance.



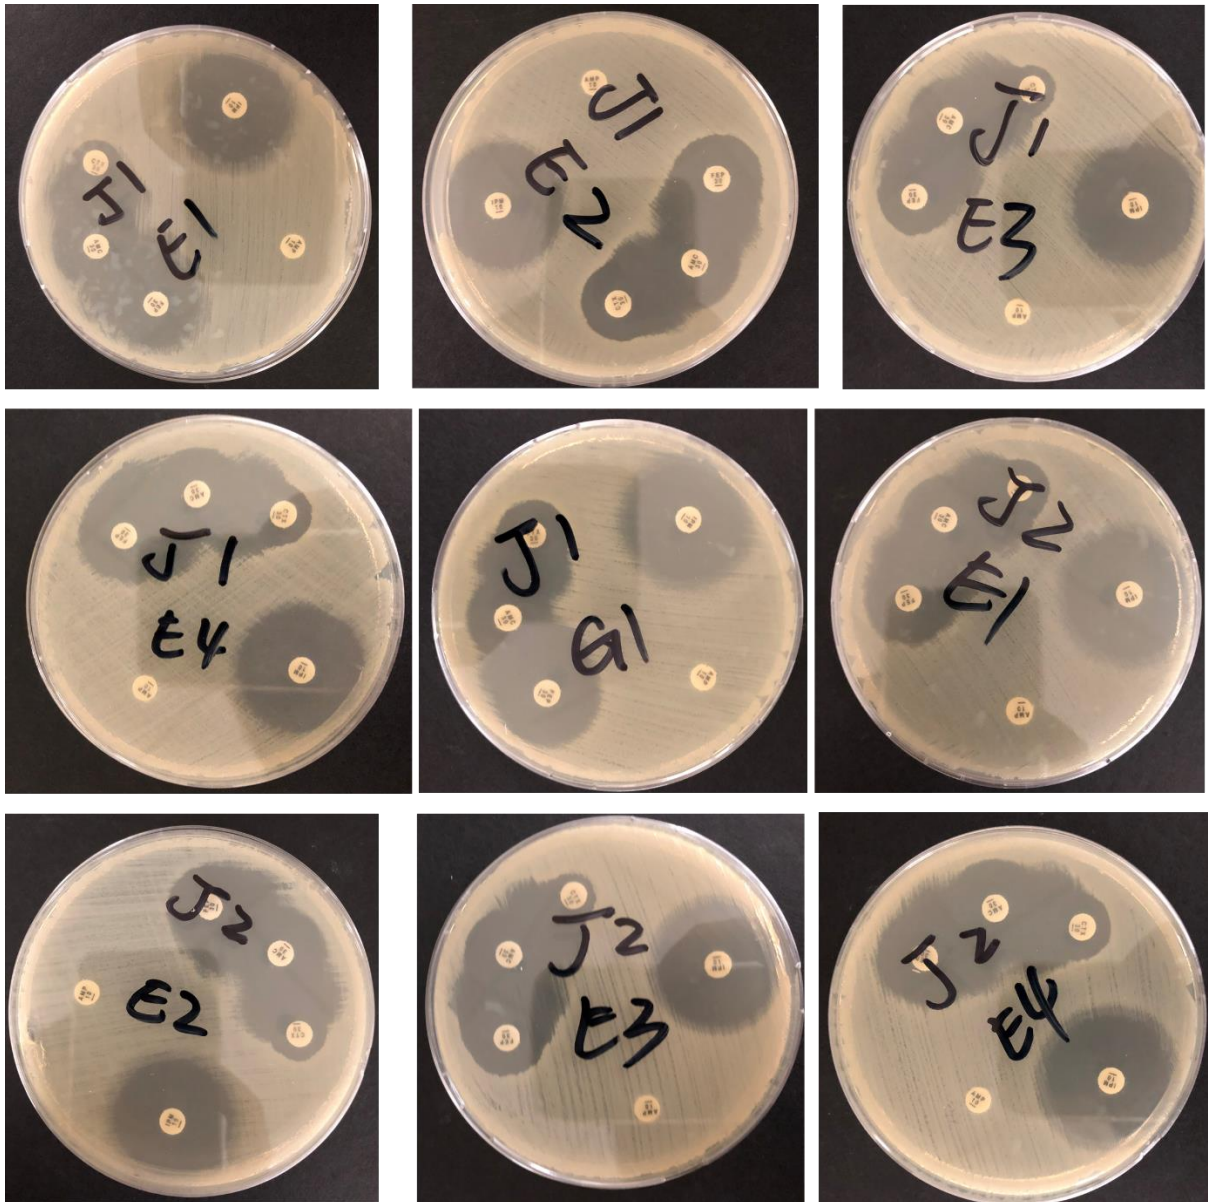

**Fig S3. The results of the double-disc synergy test.** Discs of amoxicillin/clavulanic acid (AMC, 30  $\mu$ g) were placed between the cefotaxime (CTX, 30  $\mu$ g) and cefepime (FEP, 30  $\mu$ g). The positive results were shown in all sequenced nine isolates as elliptical clearing was apparent between the AMC disc and CTX as well as FEP discs. Imipenem (IMP, 10  $\mu$ g) and ampicillin (AMP, 10  $\mu$ g) were also included for comparison.

| Isolate ID        | Resistance information |                               | Contigs information |                     |          | BLASTn output for the best hit for the contigs containing resistance genes |             |         |          |
|-------------------|------------------------|-------------------------------|---------------------|---------------------|----------|----------------------------------------------------------------------------|-------------|---------|----------|
|                   | Related resistance     | Resistance genes              | Contigs ID          | Contigs length/bp   | Coverage | Total score                                                                | Query cover | E value | Identity |
| J1E1 <sup>#</sup> | Beta-lactams           | <i>bla<sub>CTX-M-15</sub></i> | 27                  | 269951 <sup>#</sup> | 62.7856  | 3.51E+04                                                                   | 99%         | 0       | 98.34%   |
| J1E2              | Beta-lactams           | <i>bla<sub>CTX-M-8</sub></i>  | 38                  | 2271                | 80.963   | 5.01E+03                                                                   | 100%        | 0       | 100.00%  |
| J1E3              | Beta-lactams           | <i>bla<sub>TEM-1B</sub></i>   | 33                  | 7641                | 58.0969  | 1.60E+04                                                                   | 100%        | 0       | 100.00%  |
|                   | Beta-lactams           | <i>bla<sub>CTX-M-15</sub></i> | 151                 | 128211              | 62.4876  | 2.62E+05                                                                   | 97%         | 0       | 99.90%   |
| J1E4              | Colistin               | <i>mcr-1.1</i>                | 3                   | 35325               | 40.6145  | 3.33E+04                                                                   | 52%         | 0       | 97.08%   |
|                   | Beta-lactams           | <i>bla<sub>TEM-1B</sub></i>   | 71                  | 2463                | 36.5245  | 7.82E+03                                                                   | 100%        | 0       | 100.00%  |
|                   | fluoroquinolone        | <i>qnrS1</i>                  | 59                  | 19817               | 38.2183  | 4.33E+04                                                                   | 86%         | 0       | 99.94%   |
| J1G1              | Beta-lactams           | <i>bla<sub>CTX-M-15</sub></i> | 28                  | 128728              | 66.8204  | 2.31E+05                                                                   | 96%         | 0       | 99.61%   |
|                   | Beta-lactams           | <i>bla<sub>CTX-M-14</sub></i> | 80                  | 110660              | 54.303   | 1.69E+05                                                                   | 83%         | 0       | 100.00%  |
| J2E1              | Beta-lactams           | <i>bla<sub>CTX-M-27</sub></i> | 72                  | 1651                | 68.5348  | 5.32E+03                                                                   | 100%        | 0       | 100.00%  |
| J2E2 <sup>#</sup> | Fluoroquinolone        | <i>qnrS1</i>                  | 31                  | 289403 <sup>#</sup> | 56.8063  | 2.96E+04                                                                   | 80%         | 0       | 99.98%   |
|                   | Beta-lactams           | <i>bla<sub>CTX-M-15</sub></i> | 31                  | 289403 <sup>#</sup> | 56.8063  | 2.96E+04                                                                   | 80%         | 0       | 99.98%   |
|                   | Fluoroquinolone        | <i>qnrS1*</i>                 | 39                  | 15173               | 43.6608  | 3.32E+04                                                                   | 100%        | 0       | 99.93%   |
| J2E3              | Beta-lactams           | <i>bla<sub>CTX-M-55</sub></i> | 39                  | 15173               | 43.6608  | 3.32E+04                                                                   | 100%        | 0       | 99.93%   |
|                   | Colistin               | <i>mcr-3.1</i>                | 72                  | 5509                | 39.0384  | 2.36E+04                                                                   | 100%        | 0       | 100.00%  |
| J2E4 <sup>#</sup> | Beta-lactams           | <i>bla<sub>CTX-M-15</sub></i> | 220                 | 716717 <sup>#</sup> | 69.569   | 2.11E+04                                                                   | 56%         | 0       | 100%     |
|                   | Fluoroquinolone        | <i>qnrS1</i>                  | 220                 | 716717 <sup>#</sup> | 69.569   | 2.11E+04                                                                   | 56%         | 0       | 100%     |

| Isolate ID        | Best hit genome determined by Blastn     |            |                                   |           |                     |            |
|-------------------|------------------------------------------|------------|-----------------------------------|-----------|---------------------|------------|
|                   | Reference ID                             | Location   | Plasmid type                      | Country   | Source              | Accession  |
| J1E1 <sup>#</sup> | <i>E. coli</i> E-1246                    | chromosome | N.A.                              | Sweden    | Human               | CP025573.1 |
| J1E2              | <i>E. coli</i> pLV23529-CTX-M-8          | plasmid    | IncX4                             | Portugal  | animal (swine)      | KY964068.1 |
| J1E3              | <i>E. coli</i> pU14A                     | plasmid    | IncFIB                            | Australia | human               | CP035517.1 |
|                   | <i>E. coli</i> BH100                     | chromosome | N.A.                              | Brazil    | human (urine)       | CP024650.2 |
| J1E4              | <i>E. coli</i> pEC2-4                    | plasmid    | IncFIA(HI1)/IncHI1A/IncHI1B(R27)  | Malaysia  | animal (swine)      | CP016184.1 |
|                   | <i>E. coli</i> p1919D3-1                 | plasmid    | IncFIA(HI1)*/IncHI1A/IncHI1B(R27) | China     | animal (swine)      | CP046004.1 |
|                   | <i>E. coli</i> pEC2-4                    | plasmid    | IncFIA(HI1)/IncHI1A/IncHI1B(R27)  | Malaysia  | animal (swine)      | CP016184.1 |
|                   | <i>E. coli</i> WI2                       | chromosome | N.A.                              | France    | human               | LT838200.1 |
| J1G1              | <i>E. coli</i> MS14385                   | chromosome | N.A.                              | Australia | human(blood)        | LR130555.1 |
| J2E1              | <i>E. coli</i> p146-1                    | plasmid    | IncFIA*/IncFIB(AP001918)*         | USA       | human               | CP041573.1 |
| J2E2 <sup>#</sup> | <i>Klebsiella pneumoniae</i> pR210-2-CTX | plasmid    | IncFII(K)*                        | China     | human               | CP034085.1 |
|                   | <i>Salmonella</i> spp. pCFSA1096         | plasmid    | IncHI2A*                          | China     | food                | CP033347.1 |
| J2E3              | <i>Salmonella</i> spp. pCFSA1096         | plasmid    | IncHI2A*                          | China     | food                | CP033347.2 |
|                   | <i>E. coli</i> pJSWP006_1                | plasmid    | IncFIA*/IncFIB(AP001918)*         | Japan     | enviroment (sewage) | AP018939.2 |
| J2E4 <sup>#</sup> | <i>Klebsiella pneumoniae</i> pR210-2-CTX | plasmid    | IncFII(K)*                        | China     | human               | CP034085.1 |

**Table S4. Best hits of the contigs harboring AMR genes found by Blastn.** The hits were selected based on both coverage and identification. #: the size of the contigs was over the blast size limit, a 20000 bp fragment contain the AMR genes were extracted for blast instead. \*: identification below 100%

| <b>Antimicrobials<br/>(Disc Content)</b>     | <b>J1E1</b> | <b>J1E2</b> | <b>J1E3</b> | <b>J1E4</b> | <b>J2E1</b> | <b>J2E2</b> | <b>J2E3</b> | <b>J2E4</b> | <b>J1G1</b> | <b>Zone Diameter<br/>Breakpoints (mm)<br/>(CLSI-2020-M-100-<br/>ED30, Table 2A)</b> |
|----------------------------------------------|-------------|-------------|-------------|-------------|-------------|-------------|-------------|-------------|-------------|-------------------------------------------------------------------------------------|
| Chloramphenicol<br>(30 µg)                   | 22          | 24          | 26          | 0           | 23          | 24          | 0           | 21          | 24          | 12                                                                                  |
| Trimethoprim-<br>sulfamethoxazole<br>(25 µg) | 10          | 27          | 0           | 19          | 0           | 27          | 0           | 24          | 25          | 10                                                                                  |
| Tetracycline (30<br>µg)                      | 21          | 21          | 8           | 0           | 0           | 22          | 0           | 20          | 22          | 11                                                                                  |

**Table S5: Diameter of the inhibit zone for disc diffusion.** Resistant and sensitive were defined based on the breakpoints of CLSI-M100, Red: resistant, green: sensitive.

| Primer name | Sequence 5' to 3' direction   | Application products size /bp | References |
|-------------|-------------------------------|-------------------------------|------------|
| TEM-164.SE  | tcgccgcatacactattctcagaatga   | 445                           | [1]        |
| TEM-165.AS  | acgetcaccggctccagatttat       |                               |            |
| CTX-M-U1    | atgtgcagyaccagtaargtkatggc    | 593                           | [2]        |
| CTX-M-U2    | tgggtraartargtsaccagaaycagcgg |                               |            |
| MCR-1-FW    | AGTCCGTTTGTTCCTTGTGGC         | 320                           | [3]        |
| MCR-1-REV   | AGATCCTTGGTCTCGGCTTG          |                               |            |

**Table S6. Primers used for the PCR test.**

1. MONSTEIN, H.J., et al., *Multiplex PCR amplification assay for the detection of blaSHV, blaTEM and blaCTX-M genes in Enterobacteriaceae*. *Apmis*, 2007. **115**(12): p. 1400-1408.
2. Boyd, D.A., et al., *Complete nucleotide sequence of a 92-kilobase plasmid harboring the CTX-M-15 extended-spectrum beta-lactamase involved in an outbreak in long-term-care facilities in Toronto, Canada*. *Antimicrobial agents and chemotherapy*, 2004. **48**(10): p. 3758-3764.
3. Rebelo, A.R., et al., *Multiplex PCR for detection of plasmid-mediated colistin resistance determinants, mcr-1, mcr-2, mcr-3, mcr-4 and mcr-5 for surveillance purposes*. *Eurosurveillance*, 2018. **23**(6): p. 17-00672.
